# Supplementary material
Source: PubMed Central journal article supplement (PMC7441466)
Supplement: jamaoncol-e203152-s001.pdf [file jamaoncol-e203152-s001.pdf]

## Supplementary Online Content

Liu F, Huang C, Xu Z, et al; for the Chinese Laparoscopic Gastrointestinal Surgery Study (CLASS) Group. Morbidity and mortality of laparoscopic vs open total gastrectomy for clinical stage I gastric cancer: the CLASS02 multicenter randomized clinical trial. *JAMA Oncol*. Published online August 20, 2020. doi:10.1001/jamaoncol.2020.3152

**eTable 1.** Eligibility Criteria

**eTable 2.** Clinical Characteristics at Baseline

This supplementary material has been provided by the authors to give readers additional information about their work.

| <b>eTable 1. Eligibility Criteria</b>                                                                                                                                                                                 |
|-----------------------------------------------------------------------------------------------------------------------------------------------------------------------------------------------------------------------|
| <b>Inclusion</b>                                                                                                                                                                                                      |
| Aged 18-75 years                                                                                                                                                                                                      |
| Primary lesion is pathologically diagnosed as gastric adenocarcinoma                                                                                                                                                  |
| Clinical stage IA (T1N0M0) or IB (T1N1M0, T2N0M0) according to AJCC-7th TNM staging system                                                                                                                            |
| Tumor located in the upper or middle third of the stomach                                                                                                                                                             |
| No invasion to Z-line                                                                                                                                                                                                 |
| Curative resection is expected to be achievable by total gastrectomy with D1+/D2 lymphadenectomy                                                                                                                      |
| BMI < 30 kg/m <sup>2</sup>                                                                                                                                                                                            |
| ECOG PS 0 or 1                                                                                                                                                                                                        |
| ASA class: I, II, or III                                                                                                                                                                                              |
| Sufficient organ functions                                                                                                                                                                                            |
| Written informed consent                                                                                                                                                                                              |
| <b>Exclusion</b>                                                                                                                                                                                                      |
| Preoperative examination indicate enlargement of perigastric or retroperitoneal lymph nodes(≥1.0cm)                                                                                                                   |
| Preoperative neoadjuvant chemotherapy or radiotherapy                                                                                                                                                                 |
| Previous history of upper abdominal surgery (except for laparoscopic cholecystectomy)                                                                                                                                 |
| Women during pregnancy or breast-feeding                                                                                                                                                                              |
| Synchronous or metachronous (within 5 years) malignancies                                                                                                                                                             |
| Body temperature ≥ 38°C before surgery or infectious disease with a systemic therapy indicated                                                                                                                        |
| Severe mental disease                                                                                                                                                                                                 |
| Severe respiratory disease                                                                                                                                                                                            |
| Severe hepatic and renal dysfunction                                                                                                                                                                                  |
| Unstable angina pectoris or history of myocardial infarction within 6 months                                                                                                                                          |
| History of cerebral infarction or cerebral hemorrhage within 6 months                                                                                                                                                 |
| Continuous systemic steroid therapy within 1 month (except for topical use)                                                                                                                                           |
| Gastric cancer complications (bleeding, perforation, obstruction) that requiring emergency surgery                                                                                                                    |
| Patients are participating or have participated in another clinical trial (within 6 months)                                                                                                                           |
| Abbreviation: AJCC, American Joint Committee on Cancer; TNM, Tumor-Node-Metastasis; BMI, Body Mass Index; ECOG PS, Eastern Cooperative Oncology Group performance status; ASA, American Society of Anesthesiologists. |

| eTable 2. Clinical Characteristics at Baseline |  |                      |  |              |  |
|------------------------------------------------|--|----------------------|--|--------------|--|
| Factor                                         |  | Laparoscopic Surgery |  | Open Surgery |  |
| All patients- No. (%)                          |  | 105 (100)            |  | 109 (100)    |  |
| Age (years)- mean (SD)                         |  | 59.80 (9.42)         |  | 59.39 (9.16) |  |
| Gender- No. (%)                                |  |                      |  |              |  |
| Female                                         |  | 30 (28.57)           |  | 29 (26.61)   |  |
| Male                                           |  | 75 (71.43)           |  | 80 (73.39)   |  |
| BMI (Kg/m <sup>2</sup> )- mean (SD)            |  | 23.87 (3.07)         |  | 23.71 (3.13) |  |
| ECOG PS- No. (%)                               |  |                      |  |              |  |
| 0                                              |  | 62 (59.05)           |  | 71 (65.14)   |  |
| 1                                              |  | 41 (39.05)           |  | 36 (33.03)   |  |
| Missing data                                   |  | 2 (1.90)             |  | 2 (1.83)     |  |
| Comorbidity- No. (%)                           |  |                      |  |              |  |
| None                                           |  | 62 (59.05)           |  | 54 (49.54)   |  |
| One or more                                    |  | 43 (40.95)           |  | 55 (50.46)   |  |
| ASA class                                      |  |                      |  |              |  |
| I                                              |  | 52 (49.52)           |  | 56 (51.38)   |  |
| II                                             |  | 52 (49.52)           |  | 47 (43.12)   |  |
| III                                            |  | 1 (0.95)             |  | 6 (5.50)     |  |
| Tumor size (cm)- mean (SD)                     |  | 2.79 (3.18)          |  | 2.40 (2.15)  |  |
| EGJA- No. (%)                                  |  |                      |  |              |  |
| No                                             |  | 51 (48.57)           |  | 64 (58.72)   |  |
| Yes                                            |  | 54 (51.43)           |  | 44 (40.37)   |  |
| Missing data                                   |  | 0 (0.00)             |  | 1 (0.92)     |  |
| Prior EMR/ESD                                  |  |                      |  |              |  |
| No                                             |  | 95 (90.48)           |  | 101 (92.66)  |  |
| Yes                                            |  | 10 (9.52)            |  | 8 (7.34)     |  |
| Differentiation- No. (%)                       |  |                      |  |              |  |
| Well                                           |  | 17 (16.19)           |  | 17 (15.60)   |  |
| Moderate                                       |  | 39 (37.14)           |  | 42 (38.53)   |  |
| Poorly                                         |  | 34 (32.38)           |  | 38 (34.86)   |  |
| Undifferentiated                               |  | 5 (4.76)             |  | 1 (0.92)     |  |
| Unable to evaluate                             |  | 10 (9.52)            |  | 7 (6.42)     |  |
| Missing data                                   |  | 0 (0.00)             |  | 4 (3.67)     |  |
| Pathologic T stage- No. (%)                    |  |                      |  |              |  |
| T0                                             |  | 1 (0.95)             |  | 0 (0.00)     |  |
| Tis                                            |  | 2 (1.90)             |  | 4 (3.67)     |  |
| M                                              |  | 35 (33.33)           |  | 30 (27.52)   |  |
| SM                                             |  | 35 (33.33)           |  | 44 (40.37)   |  |
| MP                                             |  | 19 (18.10)           |  | 20 (18.35)   |  |
| SS                                             |  | 10 (9.52)            |  | 9 (8.26)     |  |
| SE                                             |  | 3 (2.86)             |  | 2 (1.83)     |  |
| Pathologic N stage - No. (%)                   |  |                      |  |              |  |

|                                                                                                                                                                                                                                                                                                                                |  |            |  |            |  |
|--------------------------------------------------------------------------------------------------------------------------------------------------------------------------------------------------------------------------------------------------------------------------------------------------------------------------------|--|------------|--|------------|--|
| N0                                                                                                                                                                                                                                                                                                                             |  | 85 (80.95) |  | 95 (87.16) |  |
| N1                                                                                                                                                                                                                                                                                                                             |  | 11 (10.48) |  | 6 (5.50)   |  |
| N2                                                                                                                                                                                                                                                                                                                             |  | 4 (3.81)   |  | 4 (3.67)   |  |
| N3a                                                                                                                                                                                                                                                                                                                            |  | 5 (4.76)   |  | 1 (0.92)   |  |
| N3b                                                                                                                                                                                                                                                                                                                            |  | 0 (0.00)   |  | 3 (2.75)   |  |
| Pathologic M stage - No. (%)                                                                                                                                                                                                                                                                                                   |  |            |  |            |  |
| No                                                                                                                                                                                                                                                                                                                             |  | 105 (100)  |  | 109 (100)  |  |
| Yes                                                                                                                                                                                                                                                                                                                            |  | 0 (0.00)   |  | 0 (0.00)   |  |
| Pathologic TNM stage- No. (%)                                                                                                                                                                                                                                                                                                  |  |            |  |            |  |
| 0                                                                                                                                                                                                                                                                                                                              |  | 3 (2.86)   |  | 4 (3.67)   |  |
| IA                                                                                                                                                                                                                                                                                                                             |  | 66 (62.86) |  | 74 (67.89) |  |
| IB                                                                                                                                                                                                                                                                                                                             |  | 16 (15.24) |  | 13 (11.93) |  |
| IIA                                                                                                                                                                                                                                                                                                                            |  | 8 (7.62)   |  | 8 (7.34)   |  |
| IIB                                                                                                                                                                                                                                                                                                                            |  | 5 (4.76)   |  | 6 (5.50)   |  |
| IIIA                                                                                                                                                                                                                                                                                                                           |  | 3 (2.86)   |  | 1 (0.92)   |  |
| IIIB                                                                                                                                                                                                                                                                                                                           |  | 3 (2.86)   |  | 1 (0.92)   |  |
| IIIC                                                                                                                                                                                                                                                                                                                           |  | 1 (0.95)   |  | 2 (1.83)   |  |
| IV                                                                                                                                                                                                                                                                                                                             |  | 0 (0.00)   |  | 0 (0.00)   |  |
| Abbreviation: SD, standard deviation; BMI, Body Mass Index; ECOG PS, Eastern Cooperative Oncology Group performance status; ASA, American Society of Anesthesiologists; EGJA, esophagogastric junctional adenocarcinoma; EMR, Endoscopic Mucosal Resection; ESD, Endoscopic Submucosal Dissection; TNM, Tumor-Node-Metastasis. |  |            |  |            |  |
