# Supplementary material
Source: PubMed Central journal article supplement (PMC7441466)
Supplement: jamaoncol-e203152-s003.pdf [file jamaoncol-e203152-s003.pdf]

## **Data Sharing Statement**

Liu. Morbidity and Mortality of Laparoscopic vs Open Total Gastrectomy for Clinical Stage I Gastric Cancer. *JAMA Oncol.* Published August 20, 2020. 10.1001/jamaoncol.2020.3152

### **Data**

**Data available:** No
